# Supplementary material for: Hematopoietic niche drives FLT3-ITD acute myeloid leukemia resistance to quizartinib via STAT5-and hypoxia-dependent upregulation of AXL
Source: PubMed Central journal article supplement — Haematologica. 2019 Mar 28;104(10):2017–27. doi: 10.3324/haematol.2018.205385 (PMC6886433; doi:10.3324/haematol.2018.205385), 2019-10

# A new bypass mechanism specific to the hematopoietic niche hampers the response to quizartinib through combined up-regulation of AXL activity

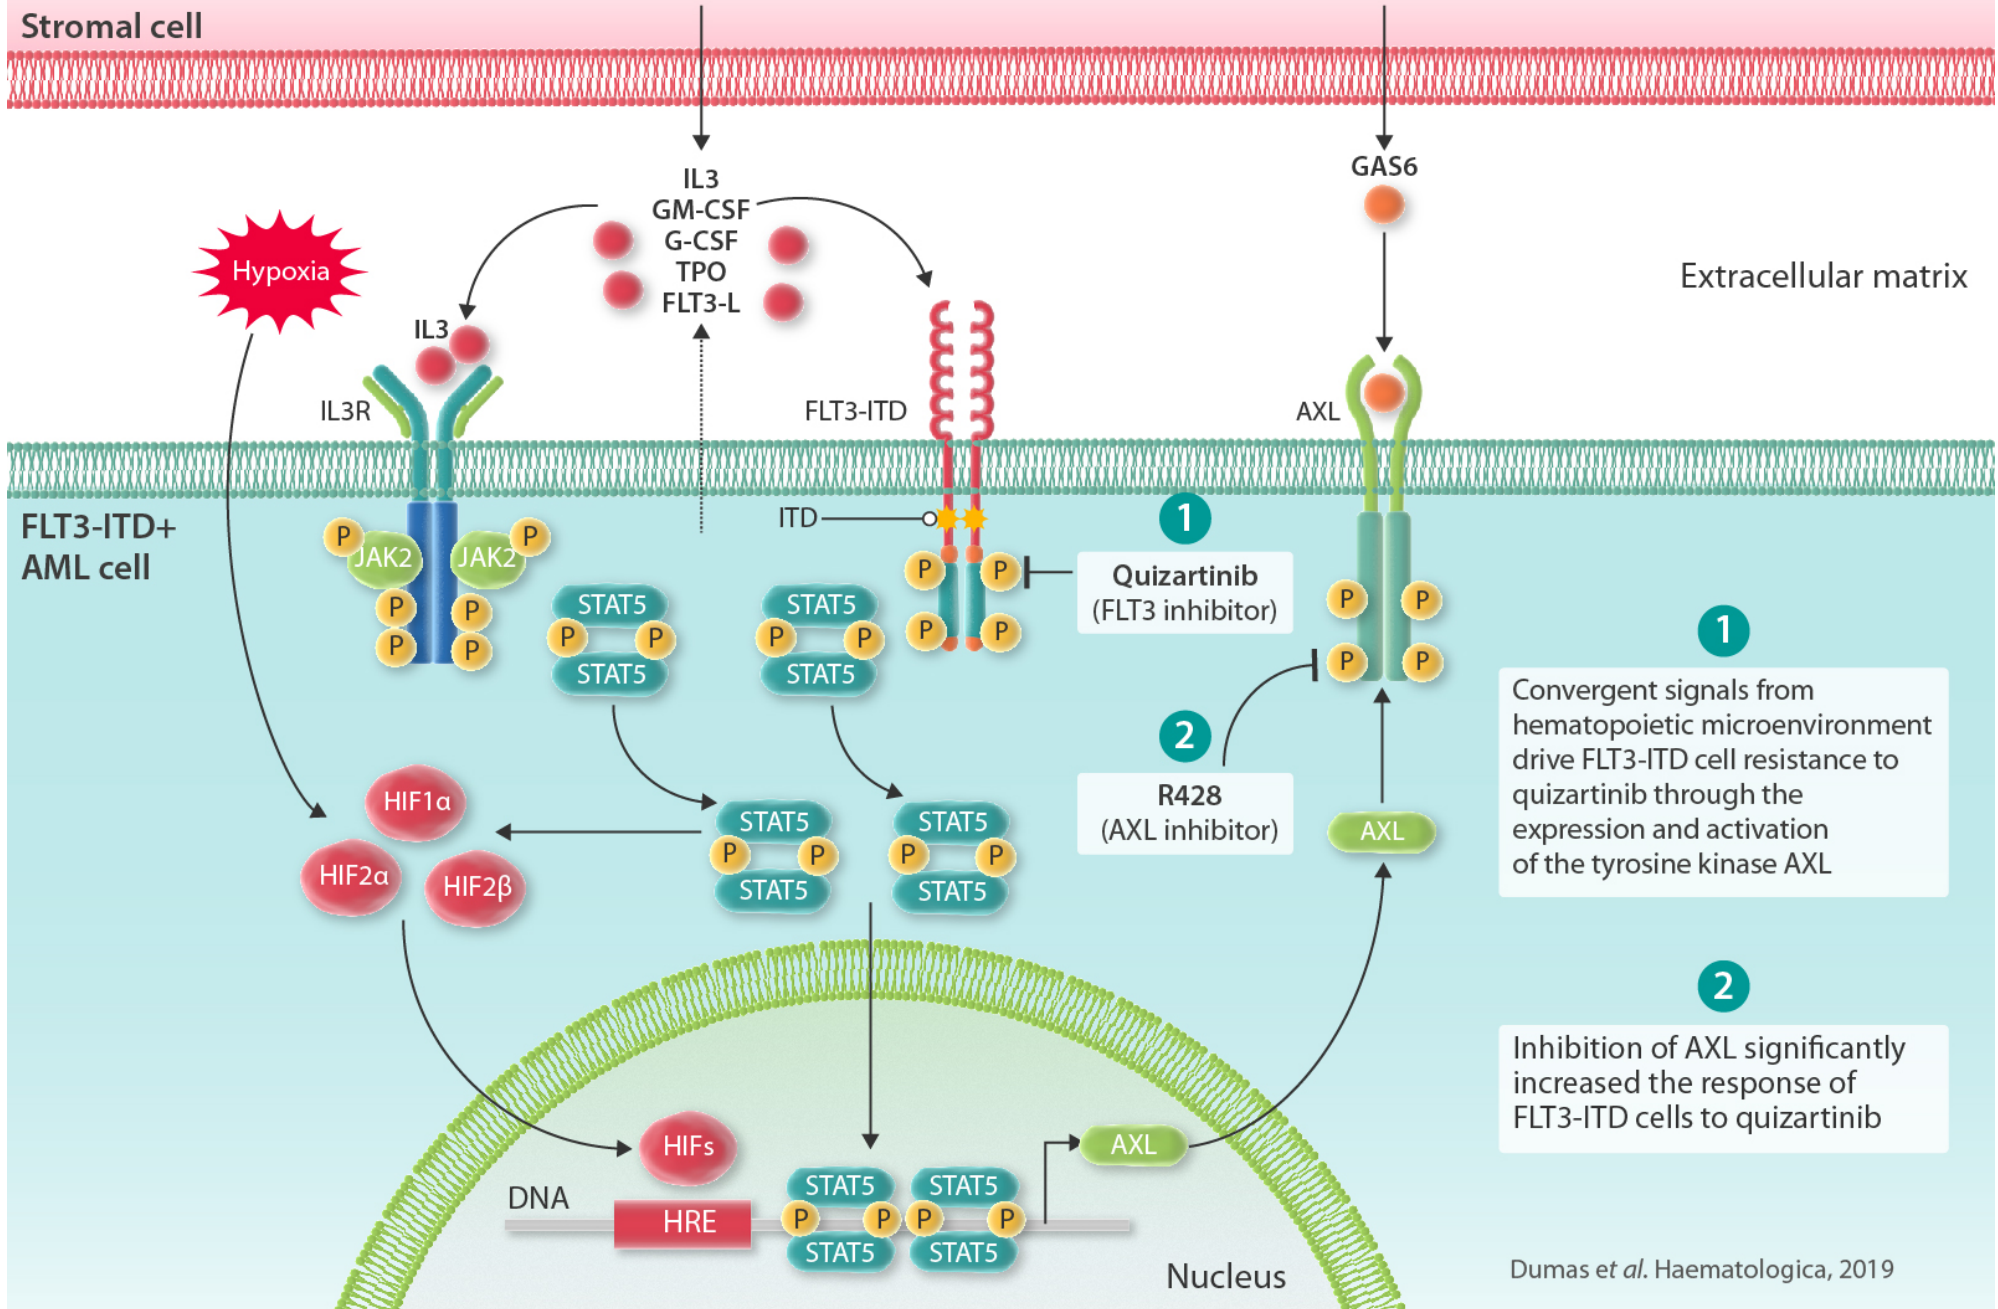

Supplement: HAEMATOL-2018-205385v3-Dumas-01.pdf [file HAEMATOL-2018-205385v3-Dumas-01.pdf]
